# Supplementary material
Source: PubMed Central journal article supplement (PMC6684979)
Supplement: rsbl20190365supp1.pdf [file rsbl20190365supp1.pdf]

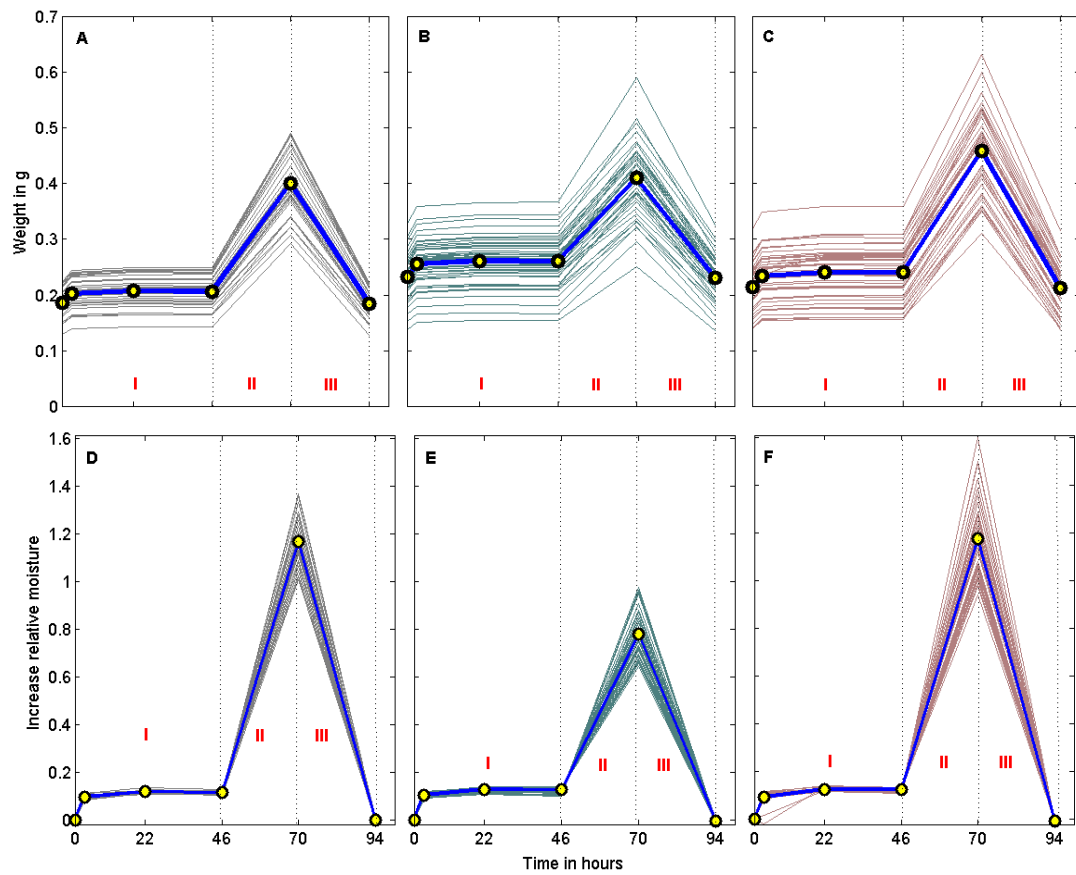

**Fig. S1.** A - C absolute weight-increase in g and D - F weight-increase relative to dryweight for beam geometry; humidification (relative humidity in air) and moistening (water dipping) of *Po. alba*, *P. radiata* and *E. regnans* over time. Average values are marked by a solid thick line. Period **I** describes the process of saturation at 80% RH (28 °C), period **II** is the increase in weight owing to the wood being dipped in water and in period **III** the wood is oven-dried again.
