# Supplementary material
Source: PubMed Central journal article supplement (PMC6684979)
Supplement: rsbl20190365supp2.pdf [file rsbl20190365supp2.pdf]

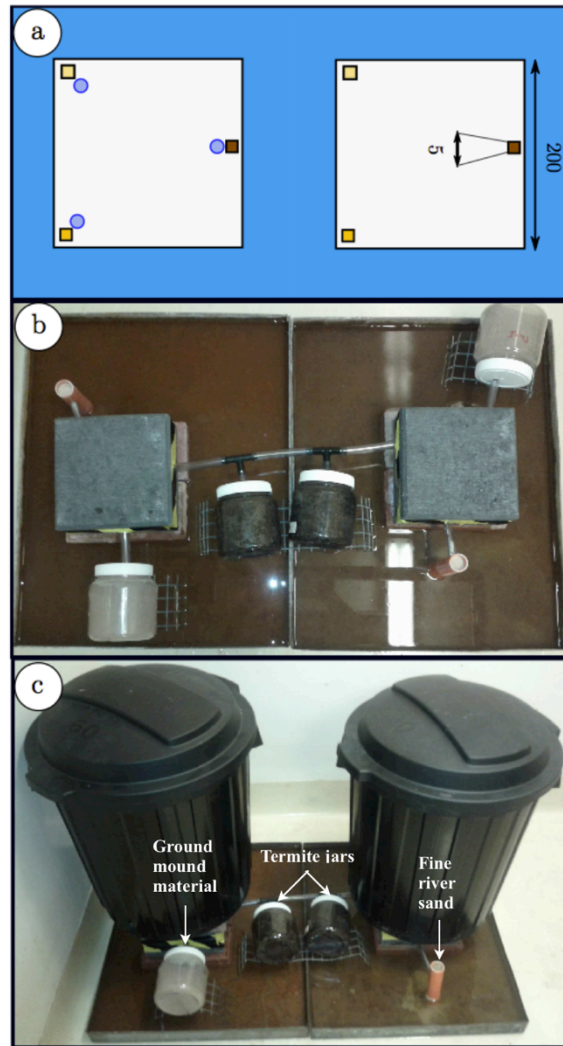

**Fig. S2.** Setup of pressure trial with wood of different tree species under compression using  $5 \times 5 \text{ mm}^2$  cross section. (a), Schematic diagram, (b), top view of one setup and (c), side view of the same setup loaded with water drums.
