# Supplementary material
Source: PubMed Central journal article supplement (PMC6684979)
Supplement: rsbl20190365supp3.pdf [file rsbl20190365supp3.pdf]

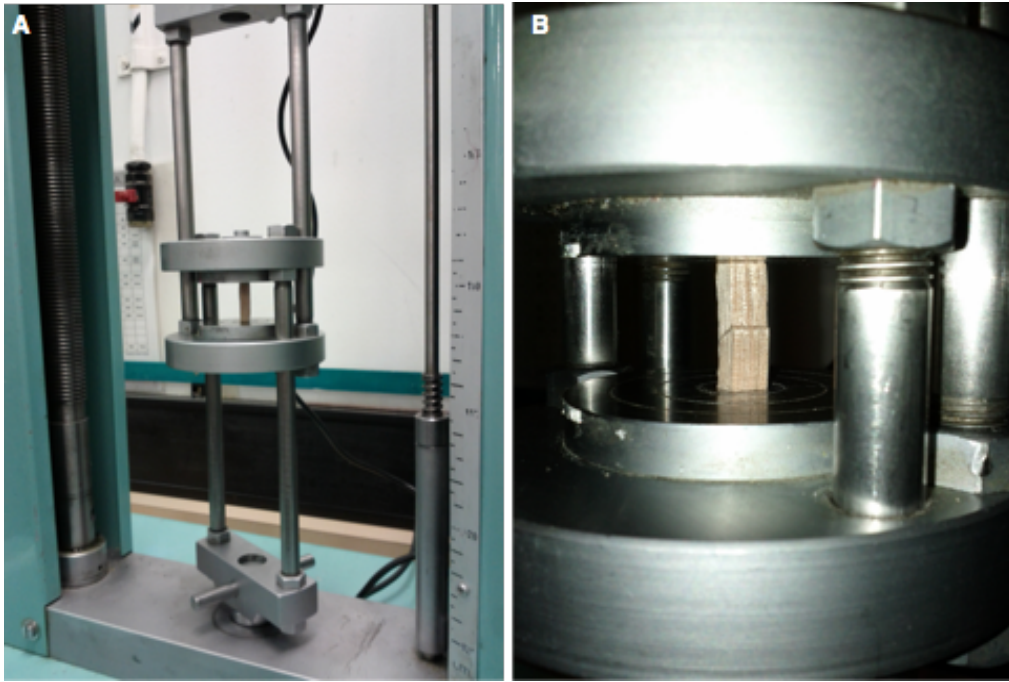

**Fig. S3.** Quasi-static compression test, **A**, experimental setup, **B**, close-up of sample after the point of yielding strength being crushed with clearly visible slip plane.
