# Supplementary material
Source: PubMed Central journal article supplement (PMC6684979)
Supplement: rsbl20190365supp4.pdf [file rsbl20190365supp4.pdf]

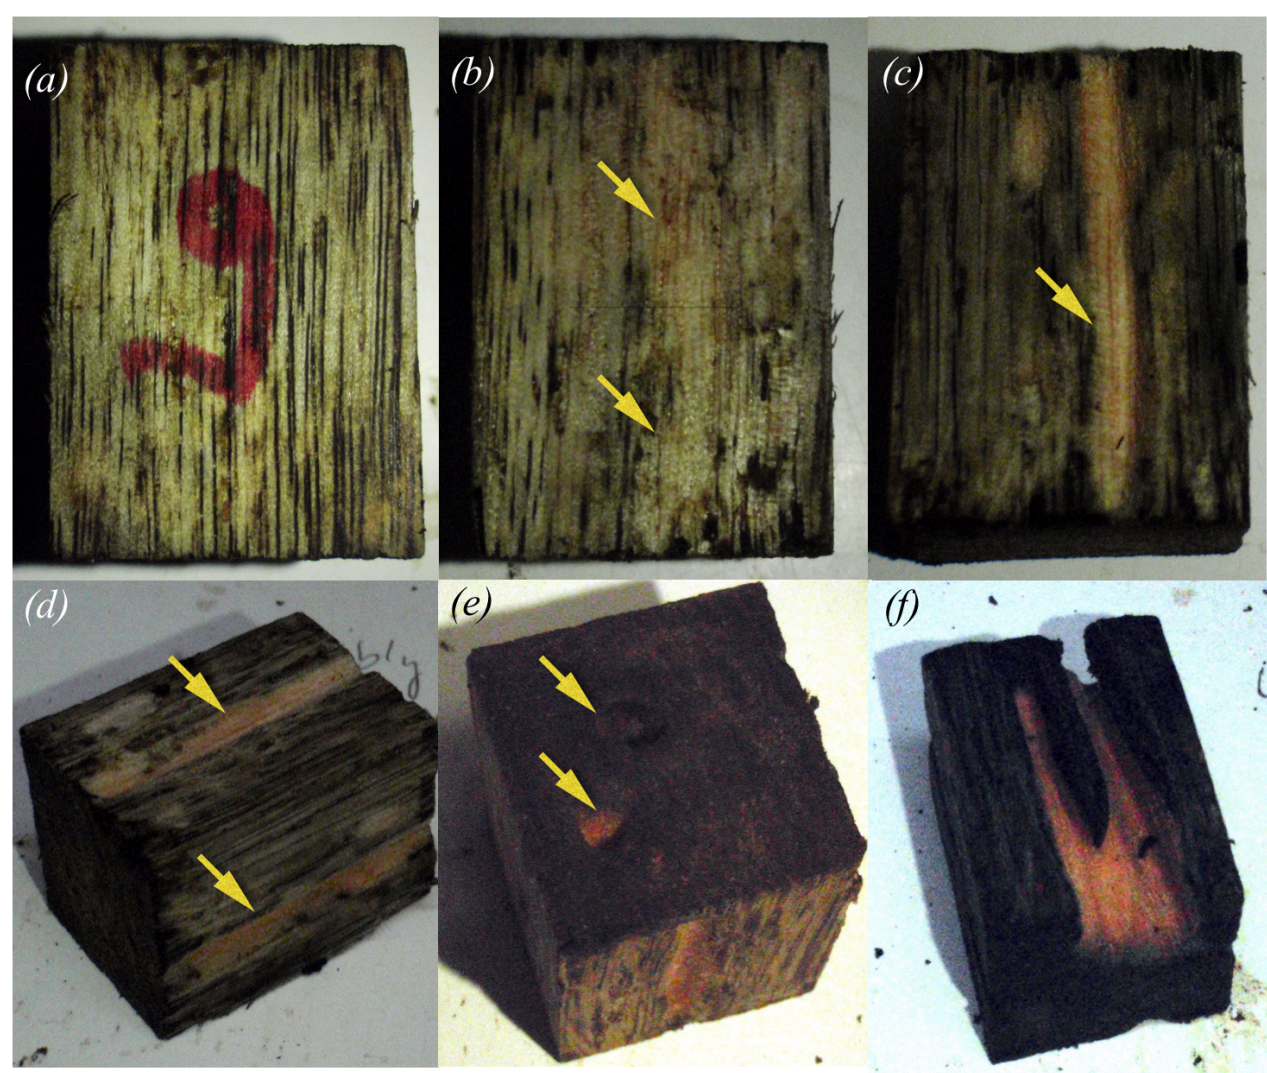

**Fig. S4.** (a), wood block after 2 days; clay layer is scraped off; (b), wooden block after 6 days: the arrows indicate nibbling activity (grazing) of the termites; (c) after about 18 days the termites removed significant amounts of wood, leaving trenches at all sides (d) as well as starting to eat along the grain (e); (f), after 22 days the wood was reduced already significantly jointing the trenches and holes.
