# Supplementary material
Source: PubMed Central journal article supplement (PMC6684979)
Supplement: rsbl20190365supp5.pdf [file rsbl20190365supp5.pdf]

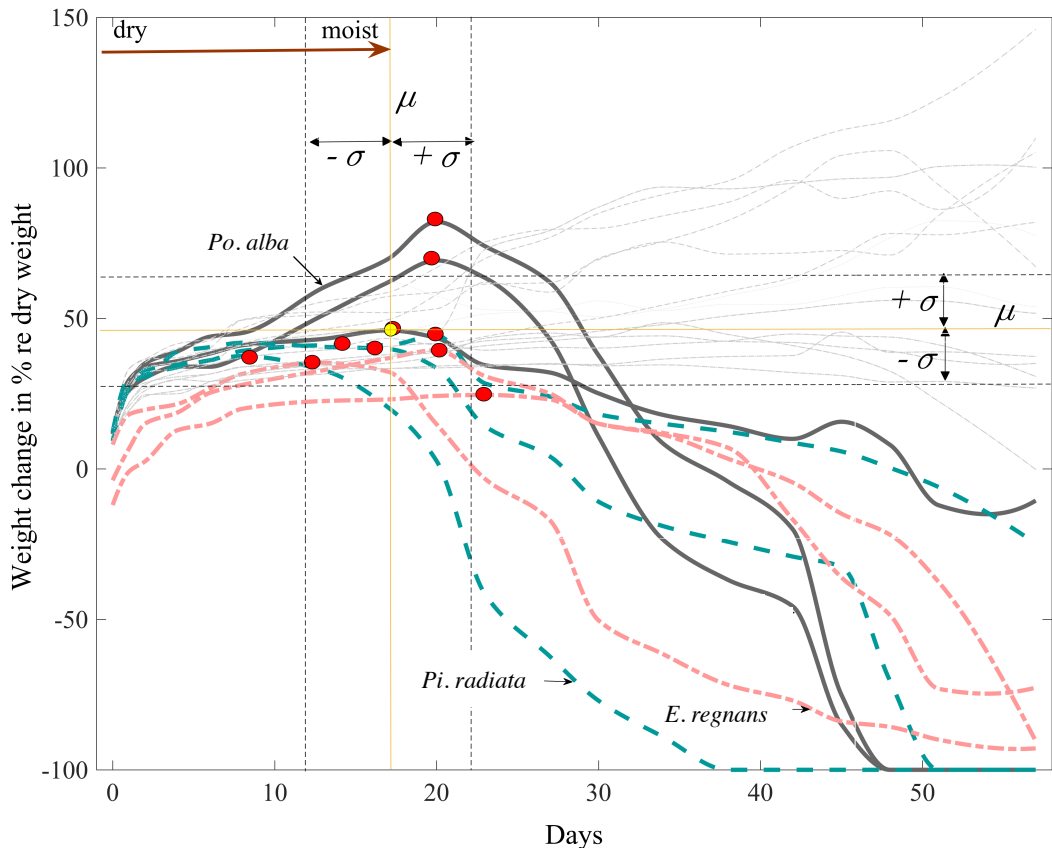

**Fig. S5. Mudding and foraging related weight changes.** Weight change over time for three different kinds of wood using 20x20mm<sup>2</sup> and 30mm length. Thin grey lines indicate failed experiments (rot fungus, no/little contact). Thick lines highlight successful experiments; peak values are marked as thick dots while  $\mu$  and  $\sigma$  mark their standard deviation.
