# Supplementary material
Source: PubMed Central journal article supplement (PMC6684979)
Supplement: rsbl20190365supp7.pdf [file rsbl20190365supp7.pdf]

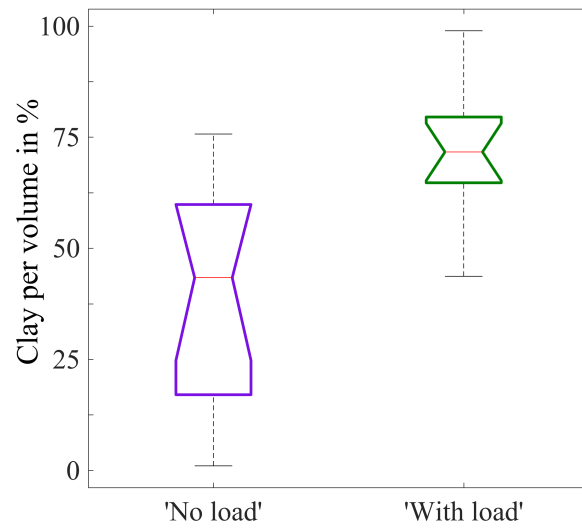

**Fig. S7.** The 'No load' units showed on average far less clay per volume than the 'With load' units. The notches of the boxes indicate 95% confidence intervals which are non-overlapping hence differences between the 'No load' and the 'With load' units are significant at the 5% level; results here are qualitatively the same as in Oberst, Lai & Evans [10].
