# Supplementary material
Source: PubMed Central journal article supplement (PMC6684979)
Supplement: rsbl20190365supp8.pdf [file rsbl20190365supp8.pdf]

Wood  
weights

| No | <i>Po. alba</i><br>weight | <i>Pi. radiata</i><br>weight | <i>E. regnans</i><br>weight |
|----|---------------------------|------------------------------|-----------------------------|
| 1  | 0.2002                    | 0.2391                       | 0.2912                      |
| 2  | 0.1809                    | 0.2157                       | 0.2511                      |
| 3  | 0.1887                    | 0.3082                       | 0.2492                      |
| 4  | 0.1951                    | 0.1918                       | 0.1837                      |
| 5  | 0.2274                    | 0.2274                       | 0.2947                      |
| 6  | 0.2054                    | 0.2477                       | 0.2433                      |
| 7  | 0.1712                    | 0.2836                       | 0.2553                      |
| 8  | 0.1975                    | 0.21                         | 0.3191                      |
| 9  | 0.2092                    | 0.262                        | 0.3985                      |
| 10 | 0.1904                    | 0.221                        | 0.2471                      |
| 11 | 0.2015                    | 0.2642                       | 0.2077                      |
| 12 | 0.2374                    | 0.1919                       | 0.2752                      |
| 13 | 0.1976                    | 0.2622                       | 0.2471                      |
| 14 | 0.1776                    | 0.2116                       | 0.333                       |
| 15 | 0.1764                    | 0.2646                       | 0.2853                      |
| 16 | 0.184                     | 0.2001                       | 0.2654                      |
| 17 | 0.2042                    | 0.2951                       | 0.2575                      |
| 18 | 0.1811                    | 0.2555                       | 0.3164                      |
| 19 | 0.2005                    | 0.2684                       | 0.2498                      |
| 20 | 0.1705                    | 0.2051                       | 0.2631                      |
| 21 | 0.208                     | 0.1877                       | 0.2764                      |
| 22 | 0.2049                    | 0.2005                       | 0.2495                      |
| 23 | 0.2103                    | 0.2651                       | 0.2388                      |
| 24 | 0.1905                    | 0.2651                       | 0.2159                      |
| 25 | 0.1837                    | 0.2692                       | 0.2916                      |
| 26 | 0.2042                    | 0.274                        | 0.3299                      |
| 27 | 0.1721                    | 0.235                        | 0.3599                      |
| 28 | 0.2022                    | 0.2534                       | 0.3131                      |
| 29 | 0.2203                    | 0.1991                       | 0.2759                      |
| 30 | 0.1995                    | 0.2307                       | 0.3091                      |
| 31 | 0.2019                    | 0.2198                       | 0.3139                      |
| 32 | 0.2198                    | 0.2126                       | 0.2532                      |
| 33 | 0.1992                    | 0.2172                       | 0.3553                      |
| 34 | 0.1852                    | 0.1884                       | 0.3301                      |
| 35 | 0.1938                    | 0.2417                       | 0.3391                      |
| 36 | 0.1774                    | 0.2882                       | 0.3041                      |
| 37 | 0.1992                    | 0.2797                       | 0.3431                      |
| 38 | 0.2038                    | 0.2588                       | 0.3263                      |
| 39 | 0.1947                    | 0.2912                       | 0.2721                      |
| 40 | 0.1699                    | 0.2252                       | 0.2627                      |
| 41 | 0.1859                    | 0.217                        | 0.3046                      |
| 42 | 0.2079                    | 0.2797                       | 0.2654                      |

|    |        |        |        |
|----|--------|--------|--------|
| 43 | 0.1869 | 0.2496 | 0.25   |
| 44 | 0.2022 | 0.2317 | 0.2682 |
| 45 | 0.1899 | 0.2385 | 0.3348 |
| 46 | 0.2043 | 0.332  | 0.3385 |
| 47 | 0.1948 | 0.2415 | 0.2764 |
| 48 | 0.1974 | 0.2124 | 0.3321 |
| 49 | 0.1728 | 0.2785 | 0.3197 |
| 50 | 0.1903 | 0.234  | 0.2385 |
| 51 | 0.1976 | 0.2189 | 0.2408 |
| 52 | 0.1898 | 0.2374 | 0.2514 |
| 53 | 0.1989 | 0.2684 | 0.3324 |
| 54 | 0.2059 | 0.2034 | 0.2782 |
| 55 | 0.1919 | 0.2202 | 0.3559 |
| 56 | 0.2087 | 0.2692 | 0.3492 |
| 57 | 0.1976 | 0.2733 | 0.3451 |
| 58 | 0.1781 | 0.2311 | 0.3189 |
| 59 | 0.1989 | 0.2051 | 0.3431 |
| 60 | 0.2027 | 0.3306 | 0.3465 |
| 61 | 0.1772 | 0.2479 | 0.3193 |
| 62 | 0.189  | 0.2235 | 0.2533 |
| 63 | 0.1874 | 0.2296 | 0.3575 |
| 64 | 0.1828 | 0.232  | 0.3424 |
| 65 | 0.1955 | 0.2399 | 0.3424 |
| 66 | 0.1877 | 0.2833 | 0.2381 |
| 67 | 0.2055 | 0.2006 | 0.2845 |

# SM Figure 1a

| Initial weight  |                    |                   |                 |                    |                   | Uneaten wood    |                    |                   |                 |                    |                   |
|-----------------|--------------------|-------------------|-----------------|--------------------|-------------------|-----------------|--------------------|-------------------|-----------------|--------------------|-------------------|
| No load         |                    |                   | With load       |                    |                   | No load         |                    |                   | With load       |                    |                   |
| <i>Po. alba</i> | <i>Pi. radiata</i> | <i>E. regnans</i> | <i>Po. alba</i> | <i>Pi. radiata</i> | <i>E. regnans</i> | <i>Po. alba</i> | <i>Pi. radiata</i> | <i>E. regnans</i> | <i>Po. alba</i> | <i>Pi. radiata</i> | <i>E. regnans</i> |
| 0.2054          | 0.1877             | 0.1837            | 0.1905          | 0.1919             | 0.2845            | 0.02            | 0.01               | 0.0123            | 0.5736          | 0.6391             | 0.1363            |
| 0.1975          | 0.21               | 0.2912            | 0.2079          | 0.2051             | 0.2916            | 0.1479          | 0.588              | 0.1286            | 0.5496          | 0.1107             | 0.1864            |
| 0.2002          | 0.2051             | 0.3131            | 0.2092          | 0.2252             | 0.2533            | 0.3458          | 0.2545             | 0.0807            | 0.5062          | 0.2881             | 0.105             |
| 0.208           | 0.2001             | 0.2853            | 0.2027          | 0.235              | 0.2782            | 0.1966          | 0.4664             | 0.4278            | 0.5124          | 0.7587             | 0.8362            |
| 0.1811          | 0.2198             | 0.2764            | 0.1712          | 0.2274             | 0.2752            | 0.3148          | 0.2622             | 0.4774            | 0.6419          | 0.7982             | 0.133             |
| 0.2015          | 0.2387             | 0.3197            | 0.1976          | 0.2391             | 0.3139            | 0.2294          | 0.4864             | 0.3919            | 0.7201          | 0.9791             | 0.0845            |
| 0.1974          | 0.2733             | 0.3424            | 0.2019          | 0.2189             | 0.3451            | 0.234           | 0.02               | 0.2643            | 0.7463          | 0.2141             | 0.1289            |
| 0.2038          | 0.232              | 0.2682            | 0.1948          | 0.2006             | 0.2654            | 0.3452          | 0.4443             | 0.3245            | 0.5596          | 0.033              | 0.017             |
| 0.2203          | 0.2172             | 0.3553            | 0.2198          | 0.2116             | 0.2759            | 0.2187          | 0.273              | 0.1261            | 0.8648          | 0.3826             | 0.1543            |
| 0.2059          | 0.2882             | 0.3492            | 0.2055          | 0.1884             | 0.2471            | 0.654           | 0.3424             | 0.761             | 0.2569          | 0.8943             | 0.6732            |
| 0.2042          | 0.2385             | 0.3431            | 0.2022          | 0.2797             | 0.3324            | 0.87            | 0.1298             | 0.3417            | 0.9846          | 0.7351             | 0.0852            |
| 0.1995          | 0.2235             | 0.3191            | 0.1992          | 0.2692             | 0.2388            | 0.6769          | 0.8176             | 0.3837            | 0.7471          | 0.2725             | 0.1327            |
| 0.1989          | 0.2684             | 0.2381            | 0.1976          | 0.2651             | 0.2385            | 0.5849          | 0.9033             | 0.2297            | 0.8653          | 0.6745             | 0.0982            |

| SM | Figure 1b       |                    | Humidity content  |                 |                    |                   |
|----|-----------------|--------------------|-------------------|-----------------|--------------------|-------------------|
|    | Without load    |                    |                   | With load       |                    |                   |
| No | <i>Po. alba</i> | <i>Pi. radiata</i> | <i>E. regnans</i> | <i>Po. alba</i> | <i>Pi. radiata</i> | <i>E. regnans</i> |
| 1  | 0.39            | 0.33               | 0.46              | 0.17            | 0.29               | 0.3               |
| 2  | 0.43            | 0.39               | 0.63              | 0.34            | 0.13               | 0.35              |
| 3  | 0.3             | 0.45               | 0.5               | 0.21            | 0.32               | 0.34              |
| 4  | 0.38            | 0.5                | 0.38              | 0.36            | 0.33               | 0.04              |
| 5  | 0.22            | 0.48               | 0.31              | 0.24            | 0.38               | 0.38              |
| 6  | 0.45            | 0.35               | 0.45              | 0.28            | 0.26               | 0.24              |
| 7  | 0.39            | 0.3                | 0.1               | 0.21            | 0.25               | 0.2               |
| 8  | 0.4             | 0.43               | 0.38              | 0.3             | 0.21               | 0.31              |
| 9  | 0.49            | 0.49               | 0.4               | 0.38            | 0.25               | 0.35              |
| 10 | 0.35            | 0.45               | 0.36              | 0.27            | 0.27               | 0.32              |
| 11 | 0.43            | 0.5                | 0.41              | 0.21            | 0.33               | 0.24              |
| 12 | 0.76            | 0.48               | 0.46              | 0.32            | 0.28               | 0.26              |
| 13 | 0.49            | 0.31               | 0.36              | 0.08            | 0.26               | 0.41              |

\*Humidity of valid samples; 2 were eaten up almost completely; 7 samples developed fungus after pull down from experiment.

SM Figure 2

|    | Dry               |             | <i>Pi. radiata</i> |             | <i>Po. alba</i> |             |
|----|-------------------|-------------|--------------------|-------------|-----------------|-------------|
|    | <i>E. regnans</i> |             |                    |             |                 |             |
|    | Displacement      | Yield point | Displacement       | Yield point | Displacement    | Yield point |
| 1  | 0.3               | 2.3         | 0.43               | 2.32        | 0.32            | 1.318       |
| 2  | 0.47              | 2.21        | 0.32               | 2.13        | 0.27            | 1.188       |
| 3  | 0.6               | 2.1         | 0.31               | 2.05        | 0.21            | 1.16        |
| 4  | 0.58              | 1.9         | 0.29               | 1.96        | 0.24            | 1.177       |
| 5  | 0.49              | 1.81        | 0.28               | 1.81        | 0.27            | 1.099       |
| 6  | 0.45              | 1.75        | 0.3                | 1.76        | 0.2615          | 1.029       |
| 7  | 0.49              | 1.66        | 0.31               | 1.7         | 0.19            | 0.984       |
| 8  | 0.43              | 1.57        | 0.34               | 1.55        | 0.2208          | 0.7225      |
| 9  | 0.47              | 1.59        | 0.3                | 1.47        | 0.2724          | 0.947       |
| 10 | 0.455             | 1.26        | 0.25               | 1.3         | 0.2961          | 0.9391      |
| 11 | 0.37              | 1.81        | 0.42               | 1.63        | 0.297           | 0.9824      |
| 12 | 0.38              | 1.76        | 0.37               | 1.44        | 0.32            | 1.03        |
| 13 | 0.41              | 1.51        | 0.38               | 1.05        | 0.29            | 1.048       |
| 14 | 0.38              | 1.52        | 0.37               | 1.22        | 0.35            | 1.318       |
| 15 | 0.38              | 1.56        | 0.39               | 1.06        | 0.419           | 0.9767      |
| 16 |                   |             | 0.47               | 1.29        | 0.354           | 0.8733      |
| 17 |                   |             | 0.47               | 1.39        |                 |             |
| 18 |                   |             | 0.36               | 0.94        |                 |             |
| 19 |                   |             | 0.44               | 2.06        |                 |             |
| 20 |                   |             | 0.31               | 0.796       |                 |             |
| 21 |                   |             | 0.51               | 1.44        |                 |             |
| 22 |                   |             | 0.48               | 1.31        |                 |             |
| 23 |                   |             | 0.29               | 1.14        |                 |             |
| 24 |                   |             | 0.32               | 1.04        |                 |             |
| 25 |                   |             | 0.38               | 1.56        |                 |             |
| 26 |                   |             | 0.39               | 1.33        |                 |             |

Failed samples did not show clear a slip plane, where split or could not be compressed .

|    | Humidified        |             | <i>Pi. radiata</i> |             | <i>Po. alba</i> |             |
|----|-------------------|-------------|--------------------|-------------|-----------------|-------------|
|    | <i>E. regnans</i> |             |                    |             |                 |             |
|    | Displacement      | Yield point | Displacement       | Yield point | Displacement    | Yield point |
| 1  | 0.56              | 1.43        | 0.36               | 0.94        | 0.26            | 0.5266      |
| 2  | 0.54              | 1.35        | 0.37               | 0.61        | 0.25            | 0.359       |
| 3  | 0.32              | 0.98        | 0.41               | 0.697       | 0.3             | 0.51        |
| 4  | 0.54              | 1.2         | 0.5                | 0.809       | 0.29            | 0.48        |
| 5  | 0.5               | 1           | 0.63               | 0.705       | 0.32            | 0.474       |
| 6  | 0.45              | 0.98        | 0.48               | 0.79        | 0.31            | 0.4081      |
| 7  | 0.4               | 0.87        | 0.55               | 0.76        | 0.33            | 0.443       |
| 8  | 0.67              | 1.45        | 0.56               | 0.64        | 0.34            | 0.45        |
| 9  | 0.7               | 1.35        | 0.52               | 0.577       | 0.39            | 0.4385      |
| 10 | 0.65              | 1.15        | 0.48               | 0.551       | 0.42            | 0.343       |

|    |      |      |      |       |      |        |
|----|------|------|------|-------|------|--------|
| 11 | 0.61 | 1.04 | 0.44 | 0.6   | 0.41 | 0.4588 |
| 12 | 0.55 | 1.05 | 0.43 | 0.51  | 0.4  | 0.435  |
| 13 | 0.52 | 0.85 | 0.41 | 0.486 | 0.46 | 0.494  |
| 14 | 0.55 | 0.75 | 0.43 | 0.91  | 0.43 | 0.535  |
| 15 | 0.67 | 0.57 | 0.46 | 0.494 | 0.58 | 0.529  |
| 16 | 0.43 | 0.83 |      |       |      |        |

Failed samples did not show clear a slip plane, where split or could not be compressed .

| After bioassay<br>With load (humidified) |       |                    | After bioassay<br>No load (humidified) |      |                    |
|------------------------------------------|-------|--------------------|----------------------------------------|------|--------------------|
| 0.14                                     | 0.025 | <i>Po. alba</i>    | 0.24                                   | 0.1  | <i>Po. alba</i>    |
| 0.25                                     | 0.21  |                    | 0.28                                   | 0.23 |                    |
| 0.17                                     | 0.1   |                    | 0.22                                   | 0.09 |                    |
| 0.18                                     | 0.085 |                    | 0.19                                   | 0.12 |                    |
| 0.02                                     | 0.19  | <i>Pi. radiata</i> | 0.12                                   | 0.04 | <i>Pi. radiata</i> |
| 0.113                                    | 0.25  |                    | 0.22                                   | 0.07 |                    |
| 0.14                                     | 0.045 |                    | 0.21                                   | 0.07 | <i>E. regnans</i>  |
| 0.23                                     | 0.21  |                    | 0.35                                   | 0.13 |                    |
| 0.14                                     | 0.32  | <i>E. regnans</i>  | 0.26                                   | 0.1  |                    |
| 0.123                                    | 0.09  |                    |                                        |      |                    |
| 0.251                                    | 0.231 |                    |                                        |      |                    |

Failed samples did not show clear a slip plane, where split or could not be compressed .
